# Supplementary material for: Earlier CRRT is Associated with Reduced Mortality in Rhabdomyolysis Patients
Source: Research Square preprint supplement (doi:10.21203/rs.3.rs-1337946/v1), 2022-02-11
Supplement: Supplementary file 2 [file c44dca4b32bc0f5b043687cb.docx]

| Additional file 1: Table S1. Logistic regression analysis for 90-day mortality of all included patients | | | | |
| --- | --- | --- | --- | --- |
| **characteristics** | **Univariate logistic regression** | | **Multivariate logistic regression** | |
| **OR (95%CI)** | **P value** | **OR (95%CI)** | **P value** |
| Age | 1.04 (1.02-1.07) | 0.000 | 1.022(0.99,1.06) | 0.235 |
| Use of Mechanical ventilation (n, %) | 7.63 (3.45-16.84) | 0.000 | 7.18 (1.67,30.83) | **0.008** |
| Use of Vasoactive drugs (n, %) | 5.22 (2.44-11.17) | 0.000 | 2.49 (0.62,10.02) | 0.199 |
| **Variables at admission to hospital** |  |  |  |  |
| APACHE Ⅱ | 1.05 (1.00-1.09) | 0.034 | 0.97 (0.87,1.07) | 0.506 |
| SOFA | 1.20 (1.08-1.35) | 0.001 | 0.83 (0.58,1.2) | 0.323 |
| Albumin (g/L) | 0.94 (0.9-0.99) | 0.009 | 0.94 (0.79,1.11) | 0.456 |
| Globulin (g/L) | 1.12 (1.03-1.22) | 0.007 | 1.18 (0.92,1.52) | 0.203 |
| cTnI (ng/ml) | 1.26 (1.07-1.48) | 0.006 | 1.23 (1.02,1.49) | **0.032** |
| Log (Nt-proBNP+1) | 2.00 (1.26-3.24) | 0.003 | 1.74 (0.47,6.41) | 0.405 |
| **Variables at initiation of CRRT** |  |  |  |  |
| APACHE Ⅱ | 1.09 (1.04-1.15) | 0.000 | 1.063 (0.96,1.178) | 0.242 |
| SOFA | 1.27 (1.14-1.42) | 0.000 | 1.08 (0.771,1.513) | 0.655 |
| Time from admission to CRRT（h) | 1.01 (1.00,1.02) | 0.038 | 1.00 (0.98,1.01) | 0.516 |
| Initiation treatment later than the peak CK | 2.24 (1.08-4.66) | 0.031 | 3.74 (1.17,11.95) | **0.026** |
| Albumin (g/L) | 0.90 (0.85-0.99) | 0.000 | 0.97 (0.81,1.16) | 0.705 |
| Globulin (g/L) | 1.09 (1.00-1.17) | 0.036 | 0.99 (0.78,1.26) | 0.918 |
| Log (Nt-proBNP+1) (pg/ml) | 1.92 (1.22,3.01) | 0.005 | 1.34 (0.37,4.85) | 0.653 |
| APACHE Ⅱ, acute physiology and chronic health evaluation Ⅱ; SOFA, sequential organ failure assessment; CRRT, continue renal replacement therapy; CK, creatine kinase. | | | | |

| Additional file 2: Table S2. Logistic regression analysis for 90 days mortality for RM patients with AKI | | | | |
| --- | --- | --- | --- | --- |
| **characteristics** | **Univariate logistic regression** | | **Multivariate logistic regression** | |
| **OR (95%CI)** | **P value** | **OR (95%CI)** | **P value** |
| Use of Mechanical ventilation (n, %) | 7 (2.93,17.00) | **0.000** | 6.56 (1.26,34.17) | **0.016** |
| Initiation treatment later than the peak CK (n, %) | 2.5 (1.13,5.54) | **0.024** | 5.82 (1.39,24.36) | **0.026** |
| cTnI (ng/ml) | 1.26 (1.06,1.15) | **0.008** | 1.43 (1.07,1.9) | **0.015** |
| CK, creatine kinase. | | | | |

Additional file
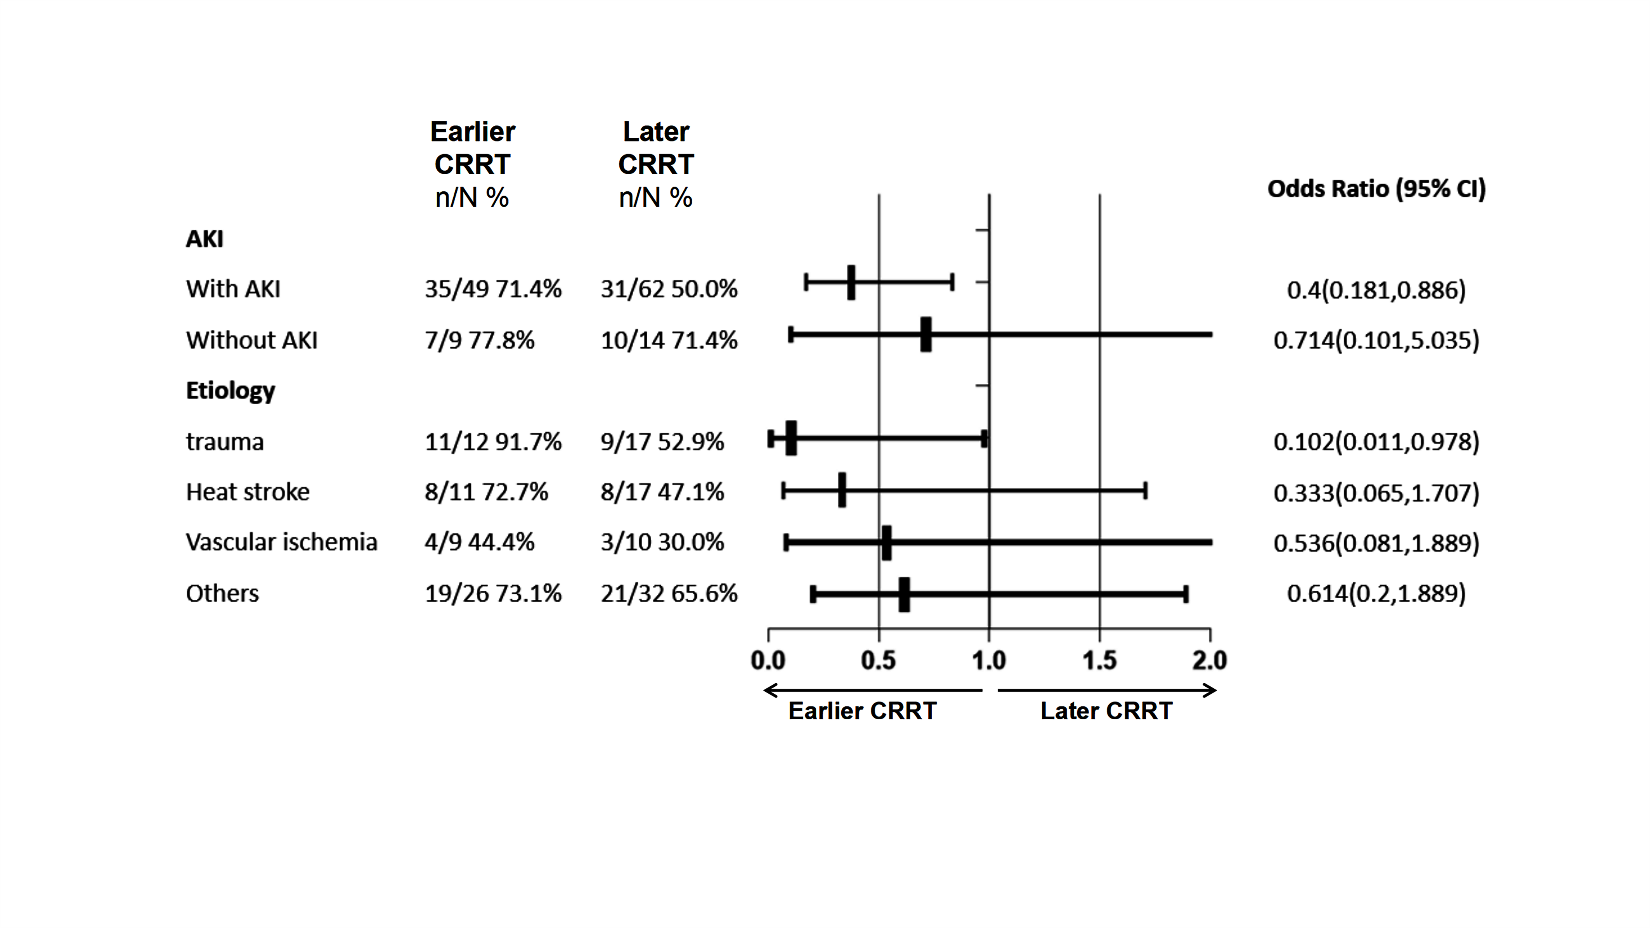
3: Figure S1. Subgroup analysis
